# Supplementary material for: Differences in Cerebral Glucose Metabolism in ALS Patients with and without C9orf72 and SOD1 Mutations
Source: MDPI journal article supplement (doi:10.3390/cells12060933), 2023-03-18
Supplement: s1 [file s1]

## Supplementary Materials

Table S1: Global Cluster peak coordinates variants and statistics of relative glucose metabolism comparing *C9orf72*-ALS with *SOD1*-ALS.

Table S2: Global Cluster peak coordinates variants and statistics of relative hypo- and hypermetabolism when comparing groups of ALS patients (i.e., *SOD1*-matched<sub>s</sub>ALS, *C9orf72*-matched<sub>s</sub>ALS, *SOD1*-ALS, and *C9orf72*-ALS) to healthy controls.

Table S3: Volume-of-interest (VOI)-based Mann–Whitney U tests of <sup>18</sup>F-FDG SUVR between healthy controls and *SOD1*-ALS (n = 22) and matched sporadic ALS (*SOD1*-matched<sub>s</sub>ALS; n = 21).

Table S4: Volume-of-interest (VOI)-based Mann–Whitney U tests of <sup>18</sup>F-FDG SUVR between healthy controls and *C9orf72*-ALS (n = 48) and matched sporadic ALS (*C9orf72*-matched<sub>s</sub>ALS; n = 48).

Table S5: Global Cluster peak coordinates variants and statistics of relative glucose metabolism comparing *C9orf72*-ALS with *C9orf72*-matched<sub>s</sub>ALS.

Table S6: Clinical and genetic data of ALS patients with a *SOD1* gene mutation.

Figure S1: T-statistical map detailing patterns of relative hypometabolism (yellow) and hypermetabolism (blue) (A) in *C9orf72*-ALS, when compared to healthy controls, and (B) in *C9orf72*-matched<sub>s</sub>ALS, when compared to healthy controls.

Figure S2: T-statistical map detailing patterns of relative hypometabolism (yellow) and hypermetabolism (blue) (A) in *SOD1*-ALS, when compared to healthy controls, and (B) in *SOD1*-matched<sub>s</sub>ALS, when compared to healthy controls.

Figure S3: Regional relative glucose metabolism in key volume-of-interest regions in four ALS groups.

**Table S1:** Global Cluster peak coordinates variants and statistics of relative glucose metabolism comparing *C9orf72*-ALS with *SOD1*-ALS, while correcting for age, sex, scanner type, and King's disease stage. L = left; R = right, SUVR = standardized uptake value ratio.

| Cluster level                                           |                  | Voxel level                       |         |                       |     |     | Anatomical region cluster  |
|---------------------------------------------------------|------------------|-----------------------------------|---------|-----------------------|-----|-----|----------------------------|
| p <sup>FWE-</sup> <sub>corr</sub>                       | K <sub>ext</sub> | p <sup>FWE-</sup> <sub>corr</sub> | T-value | Peak voxel coordinate |     |     |                            |
|                                                         |                  |                                   |         | X                     | Y   | Z   |                            |
| Relative hypometabolism in C9orf72-ALS vs. sporadic ALS |                  |                                   |         |                       |     |     |                            |
| <0.001                                                  | 1020             | 0.171                             | 4.59    | -26                   | -12 | 10  | Lentiform nucleus (L)      |
|                                                         |                  | 0.227                             | 4.49    | -22                   | 18  | -14 | Frontal orbital cortex (L) |
|                                                         |                  | 0.627                             | 4.01    | -26                   | 10  | 0   | Lentiform nucleus (L)      |
|                                                         |                  | 0.739                             | 3.90    | -16                   | 0   | -6  | Lentiform nucleus (L)      |
|                                                         |                  | 0.842                             | 3.77    | -22                   | -8  | -14 | Amygdala (L)               |
| <0.001                                                  | 1687             | 0.173                             | 4.59    | 20                    | -70 | -40 | Cerebellum                 |
|                                                         |                  | 0.295                             | 4.38    | -16                   | -70 | -40 | Cerebellum                 |
|                                                         |                  | 0.552                             | 4.09    | 4                     | -60 | -36 | Cerebellum                 |
|                                                         |                  | 0.764                             | 3.87    | 38                    | -62 | -44 | Cerebellum                 |
|                                                         |                  | 0.947                             | 3.59    | 2                     | -64 | -46 | Cerebellum                 |
| <0.001                                                  | 1330             | 0.324                             | 4.34    | 30                    | 0   | 6   | Lentiform nucleus (R)      |
|                                                         |                  | 0.637                             | 4.00    | -4                    | -24 | -26 | Brainstem (pons)           |
|                                                         |                  | 0.733                             | 3.90    | 26                    | -14 | -12 | Amygdala (R)               |
|                                                         |                  | 0.743                             | 3.89    | 28                    | 16  | -8  | Insular cortex (R)         |
|                                                         |                  | 0.753                             | 3.88    | 26                    | 20  | -10 | Frontal orbital cortex (R) |
|                                                         |                  | 0.823                             | 3.80    | 28                    | -16 | 0   | Lentiform nucleus (R)      |
|                                                         |                  | 0.843                             | 3.77    | 22                    | 0   | -2  | Lentiform nucleus (R)      |
|                                                         |                  | 0.976                             | 3.49    | 38                    | 2   | -8  | Insular cortex (R)         |
|                                                         |                  | 0.983                             | 3.45    | 14                    | -22 | -24 | Brainstem (midbrain)       |

**Table S2:** Global Cluster peak coordinates variants and statistics of relative hypo- and hypermetabolism when comparing groups of ALS patients (i.e., *SOD1*-matched<sub>sALS</sub>, *C9orf72*-matched<sub>sALS</sub>, *SOD1*-ALS, and *C9orf72*-ALS) to healthy controls.

| SPM condition<br>(contrast)                                           | p <sub>height</sub><br>uncorr | Cluster level    |                    | t-<br>value | mm  |     |                   | Brain area                                                                                                                        |
|-----------------------------------------------------------------------|-------------------------------|------------------|--------------------|-------------|-----|-----|-------------------|-----------------------------------------------------------------------------------------------------------------------------------|
|                                                                       |                               | p <sub>FWE</sub> | equiv <sub>k</sub> |             | x   | y   | z                 |                                                                                                                                   |
| Clusters of relative hypometabolism when compared to healthy controls |                               |                  |                    |             |     |     |                   |                                                                                                                                   |
| SOD1-matched <sub>sALS</sub>                                          | <0.001                        | <0.001           | 10113              | 6.52        | -32 | 60  | -4                | Frontal pole; Inferior and Middle Frontal gyrus; Frontal operculum cortex; Subcallosal Cortex; Insula; Putamen.                   |
|                                                                       |                               | <0.001           | 1787               | 5.69        | 10  | -62 | 30                | Cingulate gyrus (posterior division); Precuneus.                                                                                  |
|                                                                       |                               | 0.001            | 690                | 5.41        | -6  | -18 | -14               | Ventral diencephalon, Thalamus.                                                                                                   |
|                                                                       |                               | 0.004            | 565                | 5.03        | 58  | -62 | 24                | Lateral occipital cortex; Angular gyrus.                                                                                          |
|                                                                       |                               | 0.003            | 583                | 4.88        | -56 | -50 | -22               | Inferior and Middle temporal gyrus .                                                                                              |
|                                                                       |                               | 0.009            | 468                | 4.61        | -54 | -62 | 36                | Lateral occipital cortex.                                                                                                         |
| C9orf72-<br>matched <sub>sALS</sub>                                   | <0.001                        | <0.001           | 37102              | 8.01        | -20 | 62  | 0                 | Frontal pole; Frontal opercular cortex; Orbitofrontal cortex; Precuneus.                                                          |
|                                                                       |                               | <0.001           | 4797               | 7.41        | -58 | -52 | -18               | Inferior and Middle temporal gyrus; Lateral occipital cortex; Angular gyrus.                                                      |
|                                                                       |                               | 0.036            | 380                | 4.71        | 20  | 18  | 66                | Superior frontal gyrus.                                                                                                           |
| SOD1-ALS                                                              | <0.001                        | <0.001           | 4589               | 7.96        | -30 | 60  | -4                | Frontal pole; Precentral gyrus; Inferior and Middle frontal gyrus; Frontal operculum cortex; Insular cortex.                      |
|                                                                       |                               | 0.041            | 317                | 6.48        | 24  | -32 | 78                | Postcentral gyrus; Superior parietal lobule.                                                                                      |
|                                                                       |                               | <0.001           | 1374               | 6.12        | -44 | -60 | 56                | Lateral occipital cortex; Angular gyrus.                                                                                          |
|                                                                       |                               | <0.001           | 2023               | 6.00        | 10  | -62 | 32                | Cingulate gyrus (posterior division); Precuneus; Intracalcarine cortex.                                                           |
|                                                                       |                               | <0.001           | 5950               | 5.92        | 34  | 62  | -6                | Frontal pole; Inferior and Middle frontal gyrus; Precentral gyrus; Frontal orbital cortex; Subcallosal Cortex; Postcentral gyrus. |
|                                                                       |                               | <0.001           | 1170               | 5.91        | 58  | -54 | 40                | Angular gyrus; Lateral occipital cortex; Supramarginal gyrus.                                                                     |
|                                                                       |                               | 0.002            | 660                | 5.06        | -56 | -60 | -18               | Angular gyrus; Inferior temporal gyrus; Lateral occipital cortex; Inferior and Middle temporal gyrus.                             |
|                                                                       |                               | 0.010            | 458                | 4.73        | 22  | 6   | -6                | Putamen.                                                                                                                          |
|                                                                       | 0.013                         | 431              | 4.72               | 54          | -22 | 12  | Planum temporale. |                                                                                                                                   |

|                                                                               |        |        |       |      |     |     |     |                                                                                                                                                                                                              |
|-------------------------------------------------------------------------------|--------|--------|-------|------|-----|-----|-----|--------------------------------------------------------------------------------------------------------------------------------------------------------------------------------------------------------------|
|                                                                               |        | 0.006  | 514   | 4.34 | -16 | -16 | 12  | Thalamus.                                                                                                                                                                                                    |
| <i>C9orf72</i> -ALS                                                           | <0.001 | <0.001 | 50787 | 8.29 | -32 | 52  | 10  | Frontal pole; Frontal operculum cortex; Inferior frontal gyrus; Middle frontal gyrus; Thalamus; Cingulate gyrus posterior division; Precuneus, Inferior and Middle temporal gyrus; Lateral occipital cortex. |
|                                                                               |        | 0.001  | 883   | 5.41 | -68 | -30 | -6  |                                                                                                                                                                                                              |
| <b>Clusters of relative hypermetabolism when compared to healthy controls</b> |        |        |       |      |     |     |     |                                                                                                                                                                                                              |
| <i>SOD1</i> -matched <sub>S</sub> ALS                                         | <0.001 | 0.047  | 305   | 4.67 | 16  | -94 | -2  | Cerebellum.                                                                                                                                                                                                  |
| <i>C9orf72</i> -matched <sub>S</sub> ALS                                      | <0.001 | <0.001 | 2578  | 5.63 | 0   | -66 | -46 | Cerebellum.                                                                                                                                                                                                  |
|                                                                               |        | <0.001 | 9047  | 7.33 | 2   | -66 | -46 | Cerebellum and Medulla.                                                                                                                                                                                      |
|                                                                               |        | 0.001  | 815   | 6.71 | -44 | -4  | -24 | Medial temporal lobe (hippocampus, amygdala).                                                                                                                                                                |
| <i>C9orf72</i> -ALS                                                           | <0.001 | 0.001  | 798   | 6.09 | 30  | -20 | -14 | Medial temporal lobe (hippocampus); insular cortex.                                                                                                                                                          |
|                                                                               |        | 0.024  | 426   | 5.46 | 26  | 42  | -4  | Frontal orbital cortex; Central opercular cortex; Insular cortex.                                                                                                                                            |
|                                                                               |        | 0.044  | 358   | 4.47 | 20  | -88 | 4   | Occipital pole.                                                                                                                                                                                              |
| <i>SOD1</i> -ALS                                                              | <0.001 | <0.001 | 1637  | 5.25 | 2   | -54 | -46 | Cerebellum.                                                                                                                                                                                                  |

**Table S3:** Volume-of-interest (VOI)-based t-tests of  $^{18}\text{F}$ -FDG SUVR between healthy controls and *SOD1*-ALS (n = 22) and matched sporadic ALS (*SOD1*-matched sALS; n = 21). Significant *p*-values, after applying FDR correction ( $\alpha^{\text{FDR}} = 0.05$ ), are shown in bold. IQR, interquartile range; Md, median; sALS = sporadic ALS; *SOD1*-ALS = *SOD1*-associated ALS; SUVR = standardized uptake value ratio.

| Md (IQR)                                     | CON             | <i>SOD1</i> -ALS | Test statistic | $p^{\text{FDR}}$ value | <i>SOD1</i> -matched sALS | Test statistic | $p^{\text{FDR}}$ value    |
|----------------------------------------------|-----------------|------------------|----------------|------------------------|---------------------------|----------------|---------------------------|
| Mid Frontal gyrus                            | 1.135<br>(0.07) | 1.100<br>(0.07)  | 122.0          | <b>0.040</b>           | 1.090<br>(0.03)           | 81.5           | 0.005                     |
| Precentral gyrus                             | 1.010<br>(0.04) | 1.015<br>(0.04)  | 175.0          | 0.347                  | 1.000<br>(0.04)           | 191.0          | 0.715                     |
| Straight gyrus                               | 1.020<br>(0.04) | 0.975<br>(0.05)  | 90.0           | <b>0.005</b>           | 0.990<br>(0.06)           | 113.5          | <b>0.037</b>              |
| Orbitofrontal cortex                         | 1.070<br>(0.06) | 1.000<br>(0.07)  | 61.0           | <b>0.002</b>           | 1.000<br>(0.06)           | 57.0           | <b>0.001</b>              |
| Inferior frontal gyrus                       | 1.100<br>(0.05) | 1.075<br>(0.06)  | 66.5           | <b>0.002</b>           | 1.050<br>(0.06)           | 39.5           | <b>2.96E<sup>-4</sup></b> |
| Superior frontal gyrus                       | 1.015<br>(0.04) | 1.010<br>(0.05)  | 189.0          | 0.471                  | 1.010<br>(0.05)           | 195.0          | 0.778                     |
| Medial orbital gyrus                         | 1.005<br>(0.05) | 0.960<br>(0.05)  | 77.0           | <b>0.003</b>           | 0.960<br>(0.05)           | 89.5           | <b>0.012</b>              |
| Lateral orbital gyrus                        | 1.075<br>(0.06) | 1.025<br>(0.05)  | 70.0           | <b>0.002</b>           | 1.010<br>(0.06)           | 58.5           | <b>9.12E<sup>-4</sup></b> |
| Posterior orbital gyrus                      | 0.975<br>(0.04) | 0.940<br>(0.03)  | 104.0          | <b>0.014</b>           | 0.960<br>(0.05)           | 133.0          | 0.094                     |
| Subgenual frontal cortex                     | 0.860<br>(0.05) | 0.830<br>(0.05)  | 132.5          | 0.067                  | 0.830<br>(0.05)           | 122.5          | 0.058                     |
| Subcallosal area                             | 0.830<br>(0.08) | 0.825<br>(0.05)  | 175.0          | 0.337                  | 0.820<br>(0.07)           | 170.5          | 0.430                     |
| Pre-subgenual frontal cortex                 | 1.050<br>(0.06) | 1.030<br>(0.06)  | 111.0          | <b>0.025</b>           | 1.040<br>(0.07)           | 158.5          | 0.273                     |
| Hippocampus                                  | 0.745<br>(0.07) | 0.770<br>(0.18)  | 165.0          | 0.265                  | 0.770<br>(0.06)           | 150.5          | 0.202                     |
| Amygdala                                     | 0.690<br>(0.05) | 0.720<br>(0.07)  | 146.0          | 0.125                  | 0.730<br>(0.05)           | 117.5          | <b>0.043</b>              |
| Anterior temporal lobe (med)                 | 0.740<br>(0.04) | 0.740<br>(0.04)  | 185.5          | 0.427                  | 0.750<br>(0.05)           | 143.5          | 0.158                     |
| Anterior temporal lobe (lateral)             | 0.863<br>(0.03) | 0.860<br>(0.06)  | 213.5          | 0.893                  | 0.870<br>(0.05)           | 200.5          | 0.849                     |
| Parahippocampal and ambient gyri             | 0.790<br>(0.04) | 0.780<br>(0.03)  | 181.0          | 0.397                  | 0.780<br>(0.05)           | 183.5          | 0.580                     |
| Superior temporal gyrus, posterior           | 0.990<br>(0.05) | 1.010<br>(0.08)  | 183.5          | 0.425                  | 1.010<br>(0.04)           | 147.5          | 0.187                     |
| Middle and inferior temporal gyrus           | 0.950<br>(0.04) | 0.940<br>(0.04)  | 168.5          | 0.296                  | 0.950<br>(0.06)           | 177.5          | 0.540                     |
| Fusiform gyrus                               | 0.845<br>(0.05) | 0.840<br>(0.04)  | 216.0          | 0.919                  | 0.830<br>(0.05)           | 182.5          | 0.581                     |
| Posterior temporal lobe                      | 1.020<br>(0.03) | 1.000<br>(0.03)  | 164.5          | 0.264                  | 1.020<br>(0.03)           | 181.5          | 0.577                     |
| Superior temporal gyrus, anterior            | 0.815<br>(0.06) | 0.840<br>(0.05)  | 174.0          | 0.347                  | 0.830<br>(0.06)           | 136.5          | 0.111                     |
| Postcentral gyrus                            | 1.010<br>(0.04) | 1.010<br>(0.03)  | 184.5          | 0.426                  | 1.010<br>(0.04)           | 202.5          | 0.866                     |
| Superior parietal gyrus                      | 1.075<br>(0.05) | 1.090<br>(0.05)  | 176.0          | 0.338                  | 1.070<br>(0.06)           | 196.0          | 0.777                     |
| Inferolateral remainder of the parietal lobe | 1.075<br>(0.04) | 1.055<br>(0.04)  | 146.5          | 0.121                  | 1.050<br>(0.03)           | 98.0           | <b>0.016</b>              |

|                                         |                 |                 |       |              |                 |       |              |
|-----------------------------------------|-----------------|-----------------|-------|--------------|-----------------|-------|--------------|
| Lateral remainder of the occipital lobe | 1.060<br>(0.05) | 1.100<br>(0.05) | 87.0  | <b>0.005</b> | 1.100<br>(0.07) | 110.0 | <b>0.033</b> |
| Lingual gyrus                           | 1.135<br>(0.08) | 1.180<br>(0.06) | 121.0 | <b>0.040</b> | 1.190<br>(0.07) | 124.5 | 0.062        |
| Cuneus                                  | 1.215<br>(0.08) | 1.220<br>(0.07) | 155.5 | 0.181        | 1.210<br>(0.07) | 204.0 | 0.875        |
| Thalamus                                | 0.995<br>(0.07) | 0.935<br>(0.06) | 114.5 | <b>0.030</b> | 0.940<br>(0.07) | 111.5 | <b>0.034</b> |
| Insula                                  | 0.940<br>(0.06) | 0.930<br>(0.04) | 150.0 | 0.141        | 0.930<br>(0.05) | 156.5 | 0.259        |
| Cingulate gyrus, anterior               | 1.020<br>(0.06) | 1.005<br>(0.06) | 173.0 | 0.346        | 1.000<br>(0.09) | 170.0 | 0.437        |
| Cingulate gyrus, posterior              | 1.190<br>(0.07) | 1.160<br>(0.05) | 142.0 | 0.113        | 1.140<br>(0.07) | 127.5 | 0.072        |
| Cerebellum                              | 0.905<br>(0.06) | 0.960<br>(0.09) | 124.0 | <b>0.043</b> | 0.980<br>(0.06) | 68.0  | <b>0.002</b> |
| Medulla                                 | 0.695<br>(0.11) | 0.715<br>(0.10) | 200.5 | 0.659        | 0.740<br>(0.09) | 148.5 | 0.190        |
| Midbrain                                | 0.770<br>(0.06) | 0.740<br>(0.09) | 132.0 | 0.069        | 0.760<br>(0.06) | 177.5 | 0.522        |
| Pons                                    | 0.605<br>(0.05) | 0.625<br>(0.06) | 143.5 | 0.115        | 0.650<br>(0.05) | 100.5 | <b>0.016</b> |
| Lentiform nucleus                       | 1.175<br>(0.06) | 1.080<br>(0.07) | 79.0  | 0.003        | 1.100<br>(0.08) | 96.5  | <b>0.016</b> |

**Table S4:** Volume-of-interest (VOI)-based t-tests of  $^{18}\text{F}$ -FDG SUVR between healthy controls and *C9orf72*-ALS (n = 48) and matched sporadic ALS (*C9orf72*-matched sALS; n = 48). Significant *p*-values, after applying FDR correction ( $\alpha^{\text{FDR}} = 0.05$ ), are shown in bold. *C9orf72*-ALS, *C9orf72*-associated ALS; IQR, interquartile range; Md, median; sALS= sporadic ALS; SUVR = standardized uptake value ratio.

| Md (IQR)                                     | CON             | <i>C9orf72</i> -ALS | Test statistic | $p^{\text{FDR}}$ value    | <i>C9orf72</i> -matched sALS | Test statistic | $p^{\text{FDR}}$ value    |
|----------------------------------------------|-----------------|---------------------|----------------|---------------------------|------------------------------|----------------|---------------------------|
|                                              |                 |                     |                |                           | ALS                          |                |                           |
| Mid Frontal gyrus                            | 1.135<br>(0.07) | 1.070<br>(0.07)     | 151.0          | <b>4.76E<sup>-5</sup></b> | 1.085<br>(0.06)              | 174.0          | <b>1.85E<sup>-4</sup></b> |
| Precentral gyrus                             | 1.010<br>(0.04) | 0.990<br>(0.05)     | 321.0          | 0.054                     | 1.010<br>(0.04)              | 458.0          | 0.810                     |
| Straight gyrus                               | 1.020<br>(0.04) | 0.970<br>(0.06)     | 204.0          | <b>7.22E<sup>-4</sup></b> | 0.950<br>(0.08)              | 156.0          | <b>8.02E<sup>-5</sup></b> |
| Orbitofrontal cortex                         | 1.070<br>(0.06) | 1.010<br>(0.06)     | 139.5          | <b>3.70E<sup>-5</sup></b> | 1.000<br>(0.07)              | 86.0           | <b>3.99E<sup>-6</sup></b> |
| Inferior frontal gyrus                       | 1.100<br>(0.04) | 1.050<br>(0.06)     | 73.5           | <b>1.49E<sup>-6</sup></b> | 1.055<br>(0.06)              | 88.5           | <b>2.24E<sup>-6</sup></b> |
| Superior frontal gyrus                       | 1.015<br>(0.05) | 0.990<br>(0.04)     | 310.0          | <b>0.041</b>              | 1.000<br>(0.06)              | 377.5          | 0.227                     |
| Medial orbital gyrus                         | 1.005<br>(0.05) | 0.970<br>(0.07)     | 219.0          | <b>0.001</b>              | 0.960<br>(0.04)              | 104.0          | <b>4.37E<sup>-6</sup></b> |
| Lateral orbital gyrus                        | 1.075<br>(0.06) | 1.020<br>(0.06)     | 138.0          | <b>3.70E<sup>-5</sup></b> | 1.000<br>(0.07)              | 111.5          | <b>6.16E<sup>-6</sup></b> |
| Posterior orbital gyrus                      | 0.975<br>(0.04) | 0.960<br>(0.06)     | 322.5          | 0.053                     | 0.945<br>(0.06)              | 272.0          | <b>0.014</b>              |
| Subgenual frontal cortex                     | 0.860<br>(0.05) | 0.835<br>(0.08)     | 370.0          | 0.189                     | 0.820<br>(0.08)              | 286.5          | <b>0.021</b>              |
| Subcallosal area                             | 0.830<br>(0.08) | 0.800<br>(0.10)     | 323.0          | 0.052                     | 0.810<br>(0.10)              | 324.5          | 0.063                     |
| Pre-subgenual frontal cortex                 | 1.050<br>(0.06) | 1.005<br>(0.12)     | 311.0          | <b>0.041</b>              | 1.015<br>(0.12)              | 317.0          | 0.052                     |
| Hippocampus                                  | 0.745<br>(0.07) | 0.780<br>(0.08)     | 336.5          | 0.078                     | 0.770<br>(0.09)              | 380.5          | 0.238                     |
| Amygdala                                     | 0.690<br>(0.05) | 0.745<br>(0.07)     | 216.5          | <b>0.001</b>              | 0.720<br>(0.07)              | 309.5          | <b>0.041</b>              |
| Anterior temporal lobe (med)                 | 0.740<br>(0.04) | 0.755<br>(0.04)     | 276.0          | <b>0.014</b>              | 0.730<br>(0.06)              | 471.0          | 0.928                     |
| Anterior temporal lobe (lateral)             | 0.865<br>(0.03) | 0.870<br>(0.04)     | 470.5          | 0.898                     | 0.860<br>(0.05)              | 424.0          | 0.536                     |
| Parahippocampal and ambient gyri             | 0.790<br>(0.04) | 0.790<br>(0.03)     | 464.5          | 0.857                     | 0.790<br>(0.05)              | 433.5          | 0.593                     |
| Superior temporal gyrus, posterior           | 0.990<br>(0.05) | 1.000<br>(0.06)     | 440.0          | 0.660                     | 1.015<br>(0.06)              | 371.5          | 0.204                     |
| Middle and inferior temporal gyrus           | 0.950<br>(0.04) | 0.940<br>(0.04)     | 377.5          | 0.211                     | 0.930<br>(0.03)              | 283.5          | <b>0.020</b>              |
| Fusiform gyrus                               | 0.845<br>(0.05) | 0.840<br>(0.06)     | 443.0          | 0.652                     | 0.830<br>(0.05)              | 394.5          | 0.316                     |
| Posterior temporal lobe                      | 1.020<br>(0.03) | 1.010<br>(0.03)     | 421.0          | 0.504                     | 1.010<br>(0.04)              | 403.0          | 0.364                     |
| Superior temporal gyrus, anterior            | 0.815<br>(0.06) | 0.820<br>(0.05)     | 441.0          | 0.651                     | 0.810<br>(0.08)              | 451.0          | 0.756                     |
| Postcentral gyrus                            | 1.010<br>(0.04) | 0.980<br>(0.04)     | 309.0          | <b>0.041</b>              | 1.010<br>(0.05)              | 432.5          | 0.602                     |
| Superior parietal gyrus                      | 1.075<br>(0.05) | 1.070<br>(0.04)     | 424.0          | 0.519                     | 1.085<br>(0.04)              | 371.0          | 0.213                     |
| Inferolateral remainder of the parietal lobe | 1.075<br>(0.04) | 1.040<br>(0.04)     | 213.0          | <b>0.001</b>              | 1.050<br>(0.03)              | 278.5          | <b>0.016</b>              |

|                                         |                 |                 |       |                           |                 |       |                           |
|-----------------------------------------|-----------------|-----------------|-------|---------------------------|-----------------|-------|---------------------------|
| Lateral remainder of the occipital lobe | 1.060<br>(0.05) | 1.120<br>(0.07) | 198.5 | <b>6.04E<sup>-4</sup></b> | 1.100<br>(0.06) | 233.0 | <b>0.004</b>              |
| Lingual gyrus                           | 1.135<br>(0.08) | 1.190<br>(0.12) | 250.5 | <b>0.005</b>              | 1.190<br>(0.11) | 254.0 | <b>0.007</b>              |
| Cuneus                                  | 1.215<br>(0.08) | 1.255<br>(0.12) | 304.0 | <b>0.037</b>              | 1.230<br>(0.09) | 326.0 | 0.064                     |
| Thalamus                                | 0.995<br>(0.07) | 0.880<br>(0.10) | 130.5 | <b>2.47E<sup>-5</sup></b> | 0.930<br>(0.09) | 242.5 | <b>0.004</b>              |
| Insula                                  | 0.940<br>(0.06) | 0.925<br>(0.03) | 349.0 | 0.108                     | 0.920<br>(0.06) | 294.5 | <b>0.026</b>              |
| Cingulate gyrus, anterior               | 1.020<br>(0.06) | 0.975<br>(0.08) | 293.0 | <b>0.026</b>              | 1.005<br>(0.09) | 370.5 | 0.207                     |
| Cingulate gyrus, posterior              | 1.190<br>(0.10) | 1.120<br>(0.05) | 213.0 | <b>9.74E<sup>-4</sup></b> | 1.150<br>(0.05) | 339.0 | 0.092                     |
| Cerebellum                              | 0.905<br>(0.06) | 1.025<br>(0.07) | 91.0  | <b>2.92E<sup>-6</sup></b> | 0.985<br>(0.07) | 153.5 | <b>8.14E<sup>-5</sup></b> |
| Medulla                                 | 0.695<br>(0.11) | 0.790<br>(0.07) | 148.0 | <b>4.32E<sup>-5</sup></b> | 0.740<br>(0.07) | 304.5 | <b>0.037</b>              |
| Midbrain                                | 0.770<br>(0.06) | 0.810<br>(0.08) | 372.0 | 0.192                     | 0.790<br>(0.07) | 474.5 | 0.941                     |
| Pons                                    | 0.605<br>(0.05) | 0.680<br>(0.08) | 179.5 | <b>2.36E<sup>-4</sup></b> | 0.650<br>(0.07) | 224.0 | <b>0.003</b>              |
| Lentiform nucleus                       | 1.175<br>(0.06) | 1.155<br>(0.08) | 410.5 | 0.430                     | 1.110<br>(0.09) | 260.5 | <b>0.009</b>              |

**Table S5:** Global Cluster peak coordinates variants and statistics of relative glucose metabolism comparing *C9orf72*-ALS with *C9orf72*-matched sALS. L = left; R = right, SUVR = standardized uptake value ratio.

| Cluster level                                            |                  | Voxel level           |         |                       |      |     | Anatomical region cluster |    |                                    |
|----------------------------------------------------------|------------------|-----------------------|---------|-----------------------|------|-----|---------------------------|----|------------------------------------|
| p <sub>FWE-corr</sub>                                    | K <sub>ext</sub> | p <sub>FWE-corr</sub> | T-value | Peak voxel coordinate |      |     |                           |    |                                    |
|                                                          |                  |                       |         | X                     | Y    | Z   |                           |    |                                    |
| Relative hypometabolism in C9orf72-ALS vs. sporadic ALS  |                  |                       |         |                       |      |     |                           |    |                                    |
| 0.038                                                    | 380              | 0.003                 | 5.67    | 16                    | -30  | 2   | Thalamus (R).             |    |                                    |
|                                                          |                  | 0.961                 | 3.48    | 8                     | -10  | 2   | Thalamus (R).             |    |                                    |
|                                                          |                  | 0.001                 | 843     | 0.383                 | 4.17 | 2   | -24                       | 52 | Precentral gyrus (medial segment). |
|                                                          |                  | 0.727                 | 3.83    | 8                     | -18  | 64  | Precentral gyrus.         |    |                                    |
|                                                          |                  | 0.928                 | 3.57    | 6                     | -46  | 68  | Precuneus.                |    |                                    |
| Relative hypermetabolism in C9orf72-ALS vs. sporadic ALS |                  |                       |         |                       |      |     |                           |    |                                    |
| 0.012                                                    | 511              | 0.089                 | 4.68    | -6                    | -34  | -54 | Medulla.                  |    |                                    |
|                                                          |                  | 0.184                 | 4.45    | 10                    | -26  | -44 | Medulla.                  |    |                                    |

**Table S6:** Clinical and genetic data of ALS patients with an *SOD1* gene mutation.

| Subject       | Disease onset        | UMN involvement                 | Variant     |
|---------------|----------------------|---------------------------------|-------------|
| <i>SOD 01</i> | Spinal               | Bulbar; upper and lower limbs   | G94C        |
| <i>SOD 02</i> | Spinal               | Upper and lower limbs           | E50K        |
| <i>SOD 03</i> | Spinal               | Bulbar; upper and lower limbs   | G94C        |
| <i>SOD 04</i> | Spinal               | Bulbar; upper and lower limbs   | D91A, I114T |
| <i>SOD 05</i> | Spinal               | Upper and lower limbs           | D91A        |
| <i>SOD 06</i> | Spinal               | Upper limbs                     | I152T       |
| <i>SOD 07</i> | Bulbar               | Upper and lower limbs           | I114T       |
| <i>SOD 08</i> | Thoracic/respiratory | Thoracic, upper and lower limbs | G139V       |
| <i>SOD 09</i> | Spinal               | Bulbar; upper limbs             | D91A        |
| <i>SOD 10</i> | Spinal               | Upper and lower limbs           | G94C        |
| <i>SOD 11</i> | Spinal               | Upper and lower limbs           | N140D       |
| <i>SOD 12</i> | Spinal               | Bulbar; upper and lower limbs   | D91A        |
| <i>SOD 13</i> | Spinal               | Upper limbs                     | G94C        |
| <i>SOD 14</i> | Bulbar               | Bulbar; upper and lower limbs   | D91A        |
| <i>SOD 15</i> | Bulbar               | Upper and lower limbs           | D91A        |
| <i>SOD 16</i> | Spinal               | Upper and lower limbs           | D91A        |
| <i>SOD 17</i> | Spinal               | Upper and lower limbs           | D91A        |
| <i>SOD 18</i> | Spinal               | Upper and lower limbs           | G94C        |
| <i>SOD 19</i> | Spinal               | Bulbar; upper and lower limbs   | D91A        |
| <i>SOD 20</i> | Spinal               | Upper and lower limbs           | D91A        |
| <i>SOD 21</i> | Spinal               | Bulbar; upper and lower limbs   | L39V        |
| <i>SOD 22</i> | Spinal               | Upper limbs                     | G94C        |

Appendix G: Figure S1

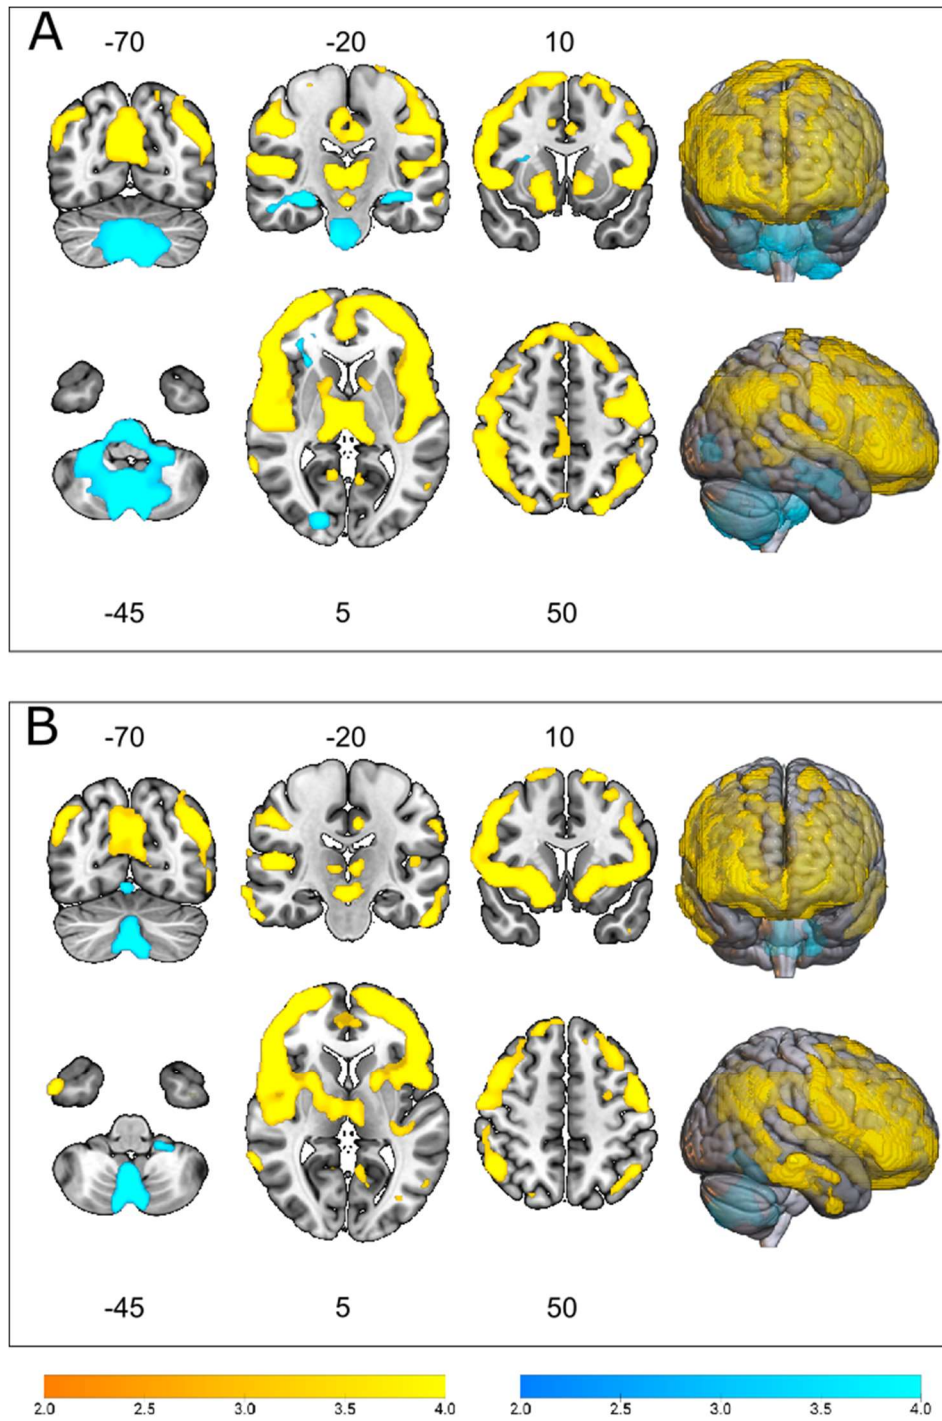

**Figure S1.** T-statistical map detailing patterns of relative hypometabolism (yellow) and hypermetabolism (blue) (A) in *C9orf72*-ALS, when compared to healthy controls, and (B) in *C9orf72*-matched sALS, when compared to healthy controls. Analyses are thresholded at  $p_{\text{uncorr}} < 0.001$  at voxel level and  $p_{\text{FWE}} < 0.05$  at cluster level and are corrected for age at FDG, sex, and scanner type. Clusters are overlaid on a T1 template.

Appendix H: Figure S2

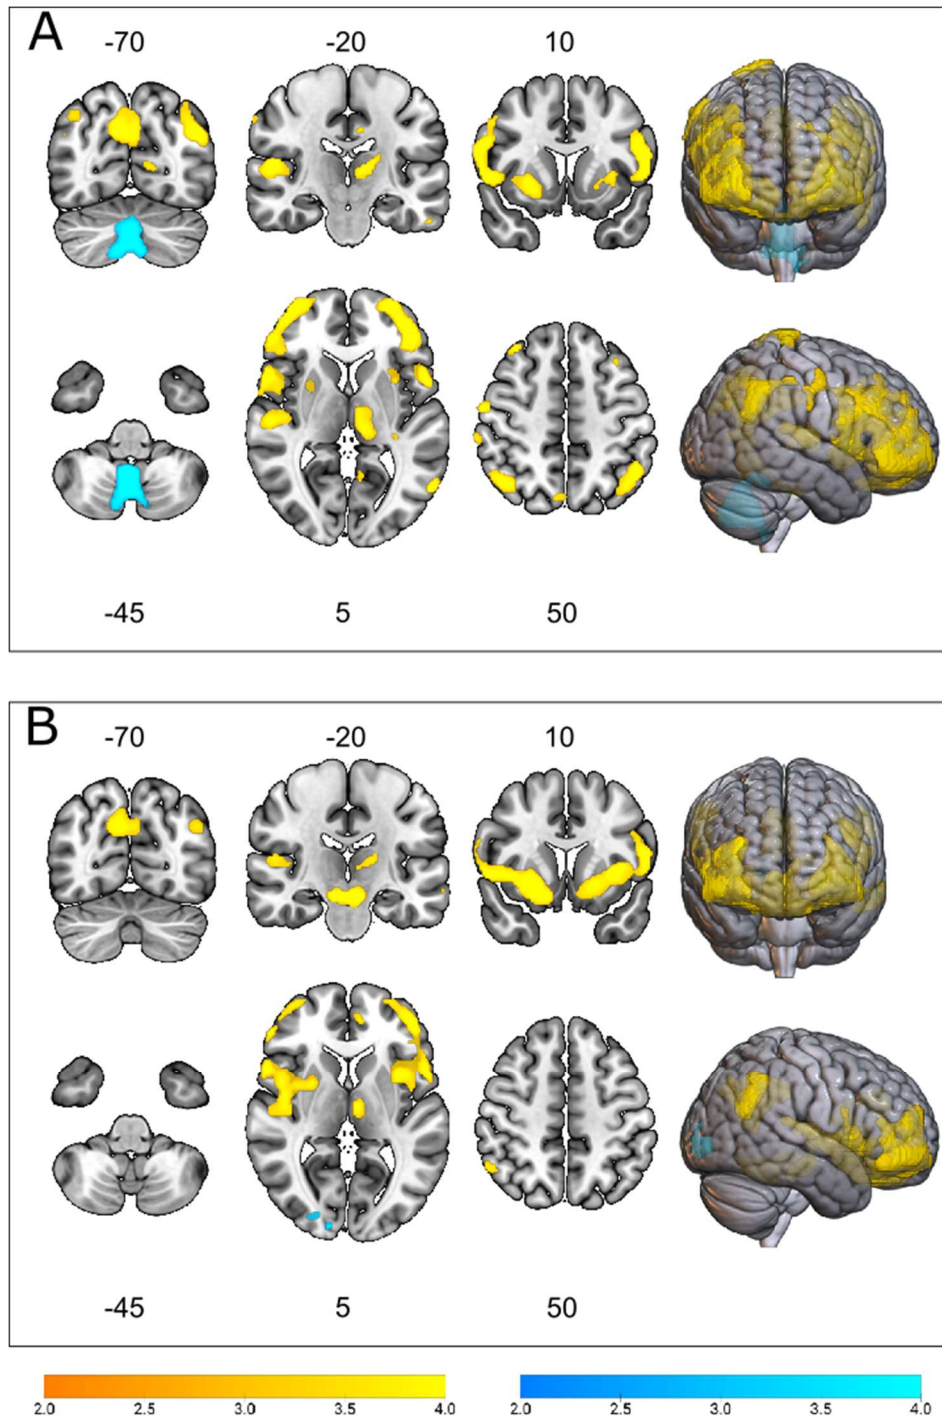

**Figure S2.** T-statistical map detailing patterns of relative hypometabolism (yellow) and hypermetabolism (blue) (A) in *SOD1*-ALS, when compared to healthy controls, and (B) in *SOD1*-matched sALS, when compared to healthy controls. Analyses are thresholded at  $p_{\text{uncorr}} < 0.001$  at voxel level and  $p_{\text{FWE}} < 0.05$  at cluster level and are corrected for age at FDG PET, sex, and scanner type. Clusters are overlaid on a T1 template.

## Appendix I: Figure S3

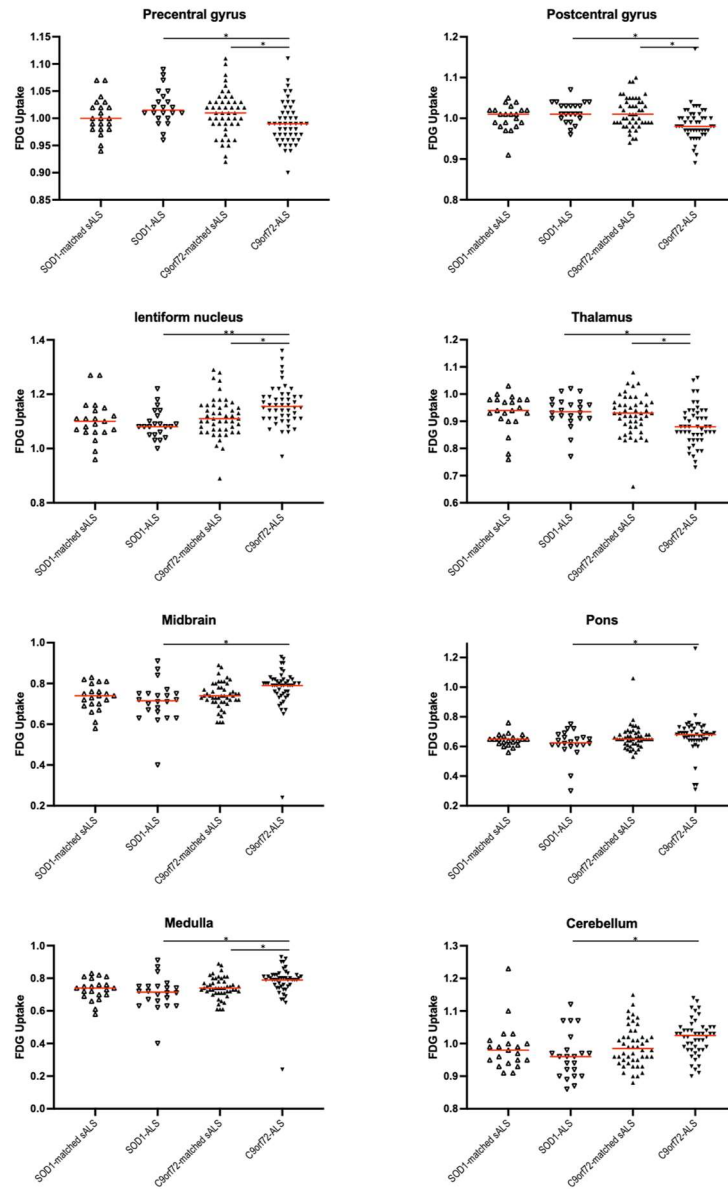

**Figure S3.** Regional relative glucose metabolism in key volume-of-interest regions (i.e., precentral gyrus, postcentral gyrus, lentiform nucleus, thalamus, midbrain, pons, medulla, cerebellum) in four ALS groups (i.e., *C9orf72*-matched sALS, *SOD1*-matched sALS, *SOD1*-ALS, *C9orf72*-ALS). Significance is denoted as: \* $P_{FDR} < 0.05$ , \*\* $P_{FDR} < 0.005$ .
